# Supplementary material for: Cost-benefit analysis of vaccination: a comparative analysis of eight approaches for valuing changes to mortality and morbidity risks
Source: Springer Nature journal article supplement (doi:10.1186/s12916-018-1130-7), 2018-08-09
Supplement: MOESM2 [file 16099998]

**Table S1. Summary of cost and QALY parameters used in the model**

| <b>Parameter</b>                       | <b>Mean</b> | <b>Distribution</b>                                  |
|----------------------------------------|-------------|------------------------------------------------------|
| <b>Treatment/Screening costs</b>       |             |                                                      |
| Cervical cancer treatment              | £16,400     | Lognormal (SD: 10,000)                               |
| Cytology (liquid-based)                | £58         | Normal (SD: 15)                                      |
| Colposcopy                             | £156        | Normal (SD: 39)                                      |
| Pre-cancerous lesion treatment         | £378        | Normal (SD: 94)                                      |
| <b>Vaccine costs (per dose)</b>        |             |                                                      |
| Quadrivalent vaccine                   | £86.50      | Fixed (LHS not used)                                 |
| Administration                         | £9.33       | Fixed (LHS not used)                                 |
| Vaccine wastage                        | 0.1         | Fixed (LHS not used)                                 |
| <b>Quality of life weights</b>         |             |                                                      |
| Cervical cancer treatment              | 0.285       | Triangular (min:0.25, max: 0.32, mode: 0.285)        |
| Post-cancer treatment                  | 0.0305      | Triangular (min: 0.00682, max: 0.0542, mode: 0.0305) |
| <b>QALY loss per episode</b>           |             |                                                      |
| Positive cytology result               | 0.025       | Normal (SD: 0.00625)                                 |
| Positive CIN1 result                   | 0.012       | Normal (SD: 0.003)                                   |
| Positive CIN2 result                   | 0.007       | Normal (SD: 0.00175)                                 |
| Positive CIN3 result                   | 0.054       | Normal (SD: 0.00135)                                 |
| Cervical cancer treatment time (years) | 0.116       | Lognormal (SD: 0.36)                                 |

Source: Jit M, Brisson M, Laprise JF, Choi YH. Comparison of two dose and three dose human papillomavirus vaccine schedules: cost effectiveness analysis based on transmission model. *BMJ* 2015; 350: g7584.
