# Supplementary material for: Cost-benefit analysis of vaccination: a comparative analysis of eight approaches for valuing changes to mortality and morbidity risks
Source: Springer Nature journal article supplement (doi:10.1186/s12916-018-1130-7), 2018-08-09
Supplement: MOESM3 [file 16099998]

**Table S2. Distribution of women in workforce and the proportion of hard-to-fill vacancies (HtFV) across industry sectors**

| <b>Industry</b>             | <b>Women (%)<sup>1</sup></b> | <b>HtFV (%)<sup>2</sup></b> |
|-----------------------------|------------------------------|-----------------------------|
| Agriculture                 | 0.6                          | 30                          |
| Manufacturing               | 5.8                          | 37.5                        |
| Construction                | 1.8                          | 43                          |
| Wholesale                   | 13.2                         | 30                          |
| Accommodation/Food Services | 6.0                          | 33                          |
| Transport and Communication | 4.7                          | 37                          |
| Financial Services          | 3.8                          | 23                          |
| Business Services           | 12.3                         | 33                          |
| Public Administration       | 6.3                          | 27                          |
| Education                   | 15.9                         | 23                          |
| Health/Social Work          | 22.1                         | 35                          |
| Arts and Other              | 6.6                          | 39                          |

Source:

1. Office for National Statistics (ONS). EMP04: Employment by occupation. 2016. Available from: <https://www.ons.gov.uk/employmentandlabourmarket/peopleinwork/employmentandemployeetypes/datasets/employmentbyoccupationemp04>
2. UK Commission for Employment and Skills (UKCES). The UK Commission's Employer Skills Survey 2015: UK Results, 2016.
