# Supplementary material for: Cost-benefit analysis of vaccination: a comparative analysis of eight approaches for valuing changes to mortality and morbidity risks
Source: Springer Nature journal article supplement (doi:10.1186/s12916-018-1130-7), 2018-08-09
Supplement: MOESM4 [file 16099998]

**Table S3. List of selected VSL estimates included in the analysis**

| <b>Approach</b>                 | <b>Source</b>                                       | <b>VSL estimate</b> |
|---------------------------------|-----------------------------------------------------|---------------------|
| Revealed Preference<br>(VSL-RP) | Gayer et al. (2002) <sup>1</sup>                    | £3.75 million       |
|                                 | US Department of Transportation (2015) <sup>2</sup> | £5.46 million       |
|                                 | Gayer et al. (2002) <sup>1</sup>                    | £7.24 million       |
| Stated Preference<br>(VSL-SP)   | Lang et al. (2014) <sup>3</sup>                     | £1.05 million       |
|                                 | OECD (2012) <sup>4</sup>                            | £1.46 million       |
|                                 | UK Health and Safety Executive (2000) <sup>5</sup>  | £3.80 million       |
|                                 | Viscusi et al. (2014) <sup>6</sup>                  | £6.49 million       |

Source:

1. Gayer T, Hamilton JT, Viscusi WK. The market value of reducing cancer risk: Hedonic housing prices with changing information. *Southern Economic Journal* 2002; (69): 266-89.
2. U.S. Department of Transportation. Revised Departmental Guidance on Valuation of a Statistical Life in Economic Analysis. In: U.S. Department of Transportation, editor.; 2016.
3. Lang HC, Chang K, Ying YH. Quality of life, treatments, and patients' willingness to pay for a complete remission of cervical cancer in Taiwan. *Health Econ* 2012; 21(10): 1217-33.
4. OECD. Mortality Risk Valuation in Environment, Health and Transport Policies, OECD Publishing; 2012. <http://dx.doi.org/10.1787/9789264130807-en>
5. UK HM Treasury. The Green Book: Appraisal and Evaluation in Central Government. In: HM Treasury, editor. London, UK; 2003.
6. Viscusi WK, Huber J, Bell J. Assessing whether there is a cancer premium for the value of a statistical life. *Health Econ* 2014; 23(4): 384-96.
