# Supplementary material for: Cost-benefit analysis of vaccination: a comparative analysis of eight approaches for valuing changes to mortality and morbidity risks
Source: Springer Nature journal article supplement (doi:10.1186/s12916-018-1130-7), 2018-08-09
Supplement: MOESM5 [file 16099998]

**Table S4. TVCs based on different methods of monetizing benefits**

| <b>Approach</b> |                                 | <b>TVC<br/>(Median, £)</b> | <b>Interquartile Ranges<br/>(£)</b> |
|-----------------|---------------------------------|----------------------------|-------------------------------------|
| FC              | Employed                        | 68.5                       | (56.0, 84.1)                        |
| FC-M            | Employed + Homemakers           | 69.1                       | (56.5, 84.7)                        |
| FC/HC           | Employed                        | 101.3                      | (87.9, 118.5)                       |
| FC/HC-M         | Employed + Homemakers           | 106.5                      | (92.6, 124.3)                       |
| HC              | Employed                        | 175.0                      | (157.4, 194.6)                      |
| HC-M            | Employed + Homemakers           | 190.9                      | (171.5, 211.2)                      |
| VSL-SP          | Lang et al, 2014                | 205.6                      | (187.2, 223.5)                      |
| QM              | £23K/QALY                       | 262.4                      | (239.7, 287.0)                      |
| FC/QM           | Employed   £23K/QALY            | 267.5                      | (244.0, 293.1)                      |
| VSL-SP          | OECD (EU-27 countries), 2012    | 286.0                      | (260.4, 310.9)                      |
| HC/QM           | Employed   £23K/QALY            | 373.1                      | (344.8, 406.7)                      |
| VSL-RP          | Gayer et al, 2002 (min)         | 734.3                      | (668.6, 798.2)                      |
| VSL-SP          | UK Health and Safety Executive  | 744.9                      | (678.3, 809.7)                      |
| VSL-SP          | Viscusi et al, 2014             | 939.1                      | (855.1, 1020.8)                     |
| VSL-RP          | US Department of Transportation | 1087.9                     | (990.6, 1182.6)                     |
| VSL-RP          | Gayer et al, 2002 (max)         | 1417.0                     | (1291.0, 1541.0)                    |
